# Supplementary material
Source: PubMed Central journal article supplement (PMC1315382)
Supplement: plntcell_tpc.105.035659_1.pdf [file plntcell_tpc.105.035659_1.pdf]

C1

C2

C3

bZIP

```
ABI5 LGROSSIYSLTLEDFQHALCE-NGKNFGSMNMDEFLVPRQGSITLPAPLCRKTVDVWSEIRQPTFGEMTLEDFLVKAGVVEKVVERRORRMKNRESAARSRARKQAYTVELEAEINQLKEEN
DPBF2 VGRQNSILSLTLEIOMK----SGKSEFGAMNMDEFLAPRQGSISLPVPLCKKTVDVWLEIRQOTLGEITLEDLVKAGVVEILMERRORRMKNRESAARSRARRQAYTVELELEINNLTEEN
AREB3 LNRQSSLYSLTLEVQNHLS-SGRALGSMNLDLLEKSRQGSITLPRDLSKKTVDVWVDIKQPTLGEITLEDLLKAGVVEKTVERRORRMKNRESAARSRARKQAYTHELEIKVSRLEEN
EEL LTRQNSLYSLKLHEVQTHLS-SGRPLGSMNLDLLEKVRQGSITLPRDLSKKTVDVWRDVKQPTLGEITLEDLLRAGVVEKTVERRORRMKNRESAARSRARKQAYTHELEIKVSRLEEN
AREB2 LARQSSVYSLTFDELQNTLGG-PGKDFGSMNMDELLKORQGSITLPRTLISQKTVDVWVCLRQOTLGEITLLEFLFRAGVVEKVIERRORRMKNRESAARSRARKQAYTLELEAEIEKIKKTN
ABF1 LARQSSLYSLTFDELQSTLGE-PGKDFGSMNMDELLKORQGSITLPRTLISQKTVDVWVYLRQOTLGEITLEDLLRAGVVEKVIERRORRMKNRESAARSRARKQAYTLELEAEIESLKLVN
ABF3 LTRQNSVYSLTFDEFQNSWGGGIGKDFGSMNMDELLKORQGSITLPRTLISQKRVDDVWVLELRQOTLGEITLLEFLVRAGVVEKVIERRORRMKNRESAARSRARKQAYTMELEAEIAQLKELN
AREB1 LTRQSGIYSLTFDEFQSS----VGKDFGSMNMDELLKORQGSITLPRTLISQKTVDVWVLDLRQOTLGEITLLEFLVRAGVVEKVIERRORRMKNRESAARSRARKQAYTVELEAEVAKLKEEN
AT5G42910 LSRQGSIVSWTVDFQFQTS----LGLDCGSMNMDELVKORQGSITLPPTLISKQNVGEVWVKSIGQOTLGEITLLEEFFIRAGARKQFVDKKLRKIKNRESAARSRARKQAQTMEVEVELENLKKDY
```
